# Supplementary material
Source: JCI journal article supplement (doi:10.1172/jci174133)
Supplement: sd1 [file 1]

**A** 4h incubation: High titer (dark) or low titer (light) VSV\* $\Delta$ G-S $\Delta$ 21 + NSPs  
 1h infection: NSPs-treated VSV\* $\Delta$ G-S $\Delta$ 21 + Vero/TMPRSS2 (10%FBS)

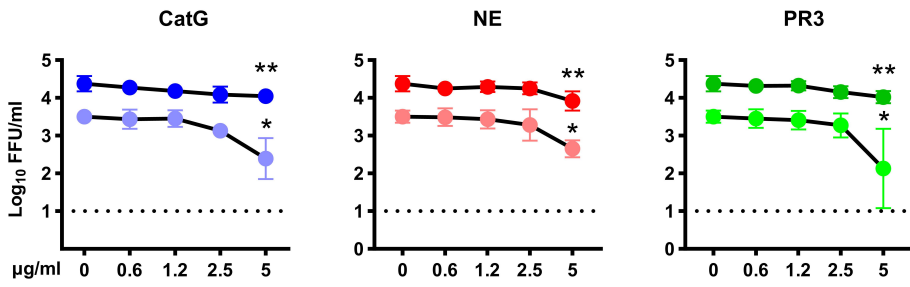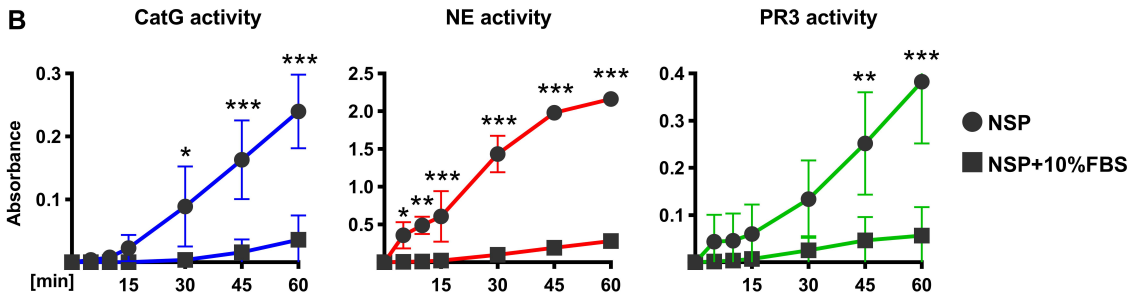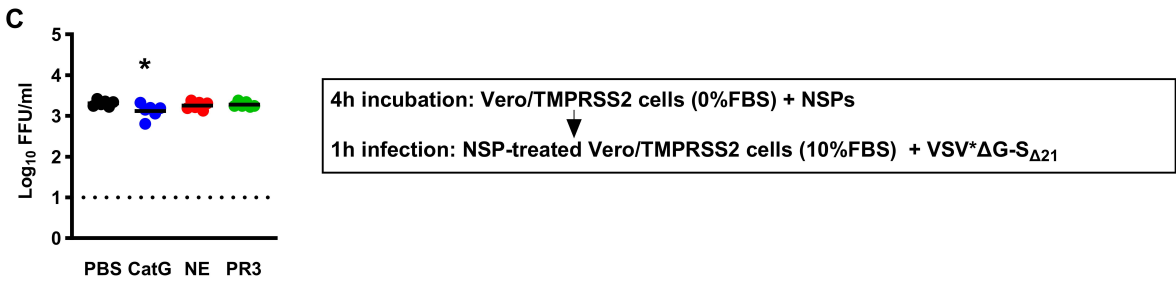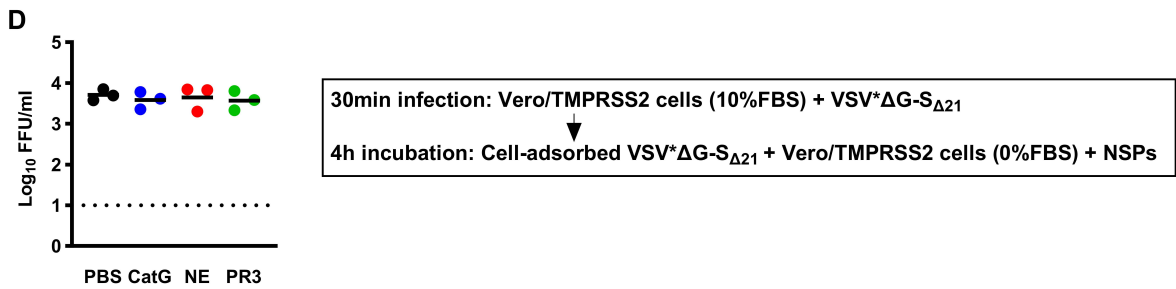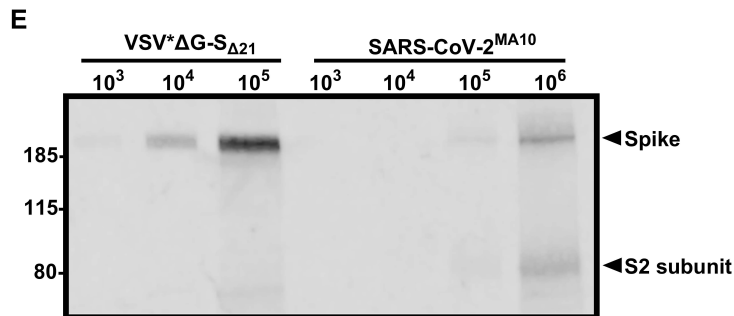

**Supplemental Figure 1. Effects of NSPs on entry of VSV\*ΔG-S<sub>Δ21</sub> in Vero/TMPRSS2 cells.**

(A) VSV\*ΔG-S<sub>Δ21</sub> ( $4 \times 10^4$  FFU dark dots; or  $4 \times 10^3$  FFU light dots) were preincubated with purified NSPs (0.6-5 μg/ml) for 4h at 37°C in PBS. Vero/TMPRSS2 cells in DMEM containing 10% FBS were then inoculated with serial dilutions of NSP-treated VSV\*ΔG-S<sub>Δ21</sub> to determine titers. Data are shown as mean ± SD of 4 independent experiments and were analyzed by one-way ANOVA with Dunnett's multiple comparisons test, comparing the NSP-treated groups to the PBS control; \*  $P < 0.05$ , \*\*  $P < 0.01$ . (B) Activity of NSPs (5 μg/ml) in phenol red-free DMEM containing 0% or 10% FBS was determined using specific chromogenic substrates for CatG (Ala-Ala-Pro-Phe), NE or PR3 (Ala-Ala-Pro-Val). Data represent mean ± SD and were analyzed by two-way ANOVA with Sidak's multiple comparisons test, comparing the effect of serum at each time point (n=3); \*  $P < 0.05$ , \*\*  $P < 0.01$ , \*\*\*  $P < 0.001$ . (C) Vero/TMPRSS2 cells were incubated with NSPs (5 μg/mL) for 4h in FBS-free DMEM. Cells were inoculated with  $4 \times 10^3$  FFU VSV\*ΔG-S<sub>Δ21</sub> for 1h in DMEM with 10% FBS. Data were analyzed by one-way ANOVA with Dunnett's multiple comparisons test, comparing the NSP-treated groups to the control (n=6); \*  $P < 0.05$ . (D) Titers of cell-adsorbed VSV\*ΔG-S<sub>Δ21</sub> incubated with NSPs. Vero/TMPRSS2 cells were inoculated with  $4 \times 10^3$  FFU VSV\*ΔG-S<sub>Δ21</sub> for 30 minutes at 37°C, 5% CO<sub>2</sub> allowing virus cell adsorption. Then, medium was removed and FBS-free medium containing purified human CatG, NE, or PR3 at a final concentration of 5 μg/ml was added. Vero/TMPRSS2 cells, cell adsorbed- VSV\*ΔG-S<sub>Δ21</sub> and NSPs were incubated for 4h at 37°C, 5% CO<sub>2</sub>. Data were analyzed by one-way ANOVA with Dunett's multiple comparisons test, comparing the NSP-treated groups to the PBS control (n=3). (A-D) Infected cells were detected by fluorescence microscopy and virus titers were calculated and expressed as FFU/ml. (E) Immunoblot of VSV\*ΔG-S<sub>Δ21</sub> and SARS-CoV-2<sup>MA10</sup> lysates probed with anti-S2 subunit antibody.
